# Supplementary material
Source: Springer Nature journal article supplement (https://www.springermedizin.de/resource/supplementary/12889_2010_3019_MOESM1_ESM.pdf/9488024)

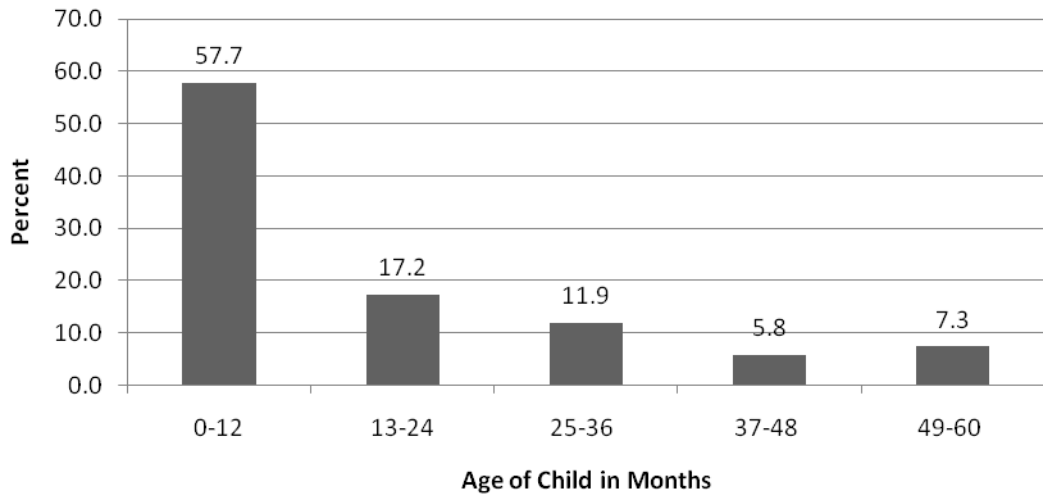

Supplement: MOESM1 [file 9488024]
